# Supplementary material for: The Circular RNA Profiles of Colorectal Tumor Metastatic Cells
Source: Front Genet. 2018 Feb 9;9:34. doi: 10.3389/fgene.2018.00034 (PMC5811837; doi:10.3389/fgene.2018.00034)
Supplement: Supplementary file 6 [file Table6.XLSX]

## Sheet: Table S6
	Header descriptions
	circRNA	circRNAs predicted to be sponger of CRC-related microRNA	n = 16
	Type	Type of circRNA
	Diff	If |log2FC| >= 1 and adjusted P-value < 0.05 then it is Y else N (NCM460/SW480,NCM460/SW620, SW480/SW620)
	Parent gene	Parent gene of circRNA
	Parent gene type	The parent gene is metastasis-related (metastasis) or it is a functional gene in KEGG pathway of Colorectal cancer (CRC)
	microRNA	The circRNA is a spong of the miRNAs
	microRNA type	The microRNA is metastasis-related (metastasis) or CRC-related (CRC)
	Table S6 CRC-related circRNA-miRNA networks (DECs with functional parent genes)
	circRNA	Type	Diff	Parent gene	Parent gene type	microRNA	microRNA type
	5:80678927|80761678	exon	Y,Y,N	MSH3	metastasis	hsa-miR-16 hsa-miR-28 hsa-miR-760	both
	18:47865059|47870564	exon	Y,Y,N	SMAD2	CRC	hsa-miR-139 hsa-miR-200c hsa-miR-148b	CRC
	8:15650697|15662296	exon	Y,Y,N	TUSC3	metastasis	hsa-miR-93	metastasis
	8:15650697|15673836	exon	Y,Y,N	TUSC3	metastasis	hsa-miR-93	metastasis
	5:80678927|80744615	exon	Y,Y,N	MSH3	metastasis	hsa-miR-16 hsa-miR-760	both
	21:34834410|34859578	exon	Y,Y,N	RUNX1	CRC	hsa-miR-4478	metastasis
	19:41888064|41888865	exon	Y,N,N	ARHGEF1	metastasis	hsa-miR-423 hsa-miR-149 hsa-miR-371a hsa-miR-760 hsa-miR-3184	both
	21:34859474|34880713	exon	Y,N,N	RUNX1	CRC	hsa-miR-27a	metastasis
	8:15623080|15673836	exon	Y,N,N	TUSC3	CRC	hsa-miR-4478	metastasis
	8:15730666|15748465	exon	Y,N,N	TUSC3	metastasis	hsa-miR-624	metastasis
	10:31355144|31387266	exon	Y,N,N	ZEB1	metastasis	hsa-miR-342 hsa-miR-148a hsa-miR-494	metastasis
	5:126804776|126805696	exon	Y,N,N	LMNB1	CRC	hsa-miR-143	metastasis
	18:47865059|47896809	exon	Y,N,N	SMAD2	CRC	hsa-miR-139 hsa-miR-200c hsa-miR-148b hsa-miR-31	CRC
	5:80767933|80778836	exon	N,Y,N	MSH3	CRC	hsa-miR-378d hsa-miR-378i hsa-miR-378b hsa-miR-378f hsa-miR-378h hsa-miR-17 hsa-miR-378c hsa-miR-378e hsa-miR-378a	CRC
